# Supplementary material for: The efficacy of sampling strategies for estimating scabies prevalence
Source: bioRxiv or medRxiv preprint supplement (doi:10.1101/2021.11.13.21266293), 2021-12-10
Supplement: Supplementary file [file media-1.pdf]

# Supporting information to manuscript ‘The efficacy of sampling strategies for estimating scabies prevalence’

Nefel Tellioglu<sup>1</sup>, Rebecca H. Chisholm<sup>2,3</sup>, Jodie McVernon<sup>3,4</sup>, Nicholas Geard<sup>1,5</sup>,  
Patricia T. Campbell<sup>3,4\*</sup>

**1** School of Computing and Information Systems, The University of Melbourne, Melbourne, Australia

**2** Department of Mathematics and Statistics, La Trobe University, Bundoora, Australia

**3** Centre for Epidemiology and Biostatistics, Melbourne School of Population and Global Health, The University of Melbourne, Melbourne, Australia

**4** Peter Doherty Institute for Infection and Immunity, The Royal Melbourne Hospital and The University of Melbourne, Melbourne, Australia

**5** Department of Infectious Diseases, The University of Melbourne, Australia

\* [patricia.campbell@unimelb.edu.au](mailto:patricia.campbell@unimelb.edu.au)

**S1 Fig. Observed scabies prevalence in samples for given sampling percentages, across each of the different scabies assignment methods.** The results (median and 2.5% to 97.5% quantiles) are plotted for an exemplar input prevalence percentage between 20–30% across all population sizes where (a) random, (b) high household-specific, (c) mild household-specific, (d) age-specific, (e) age-and-household-specific scabies assignment method is used. Red dashed lines represent 20% and 30% prevalence.

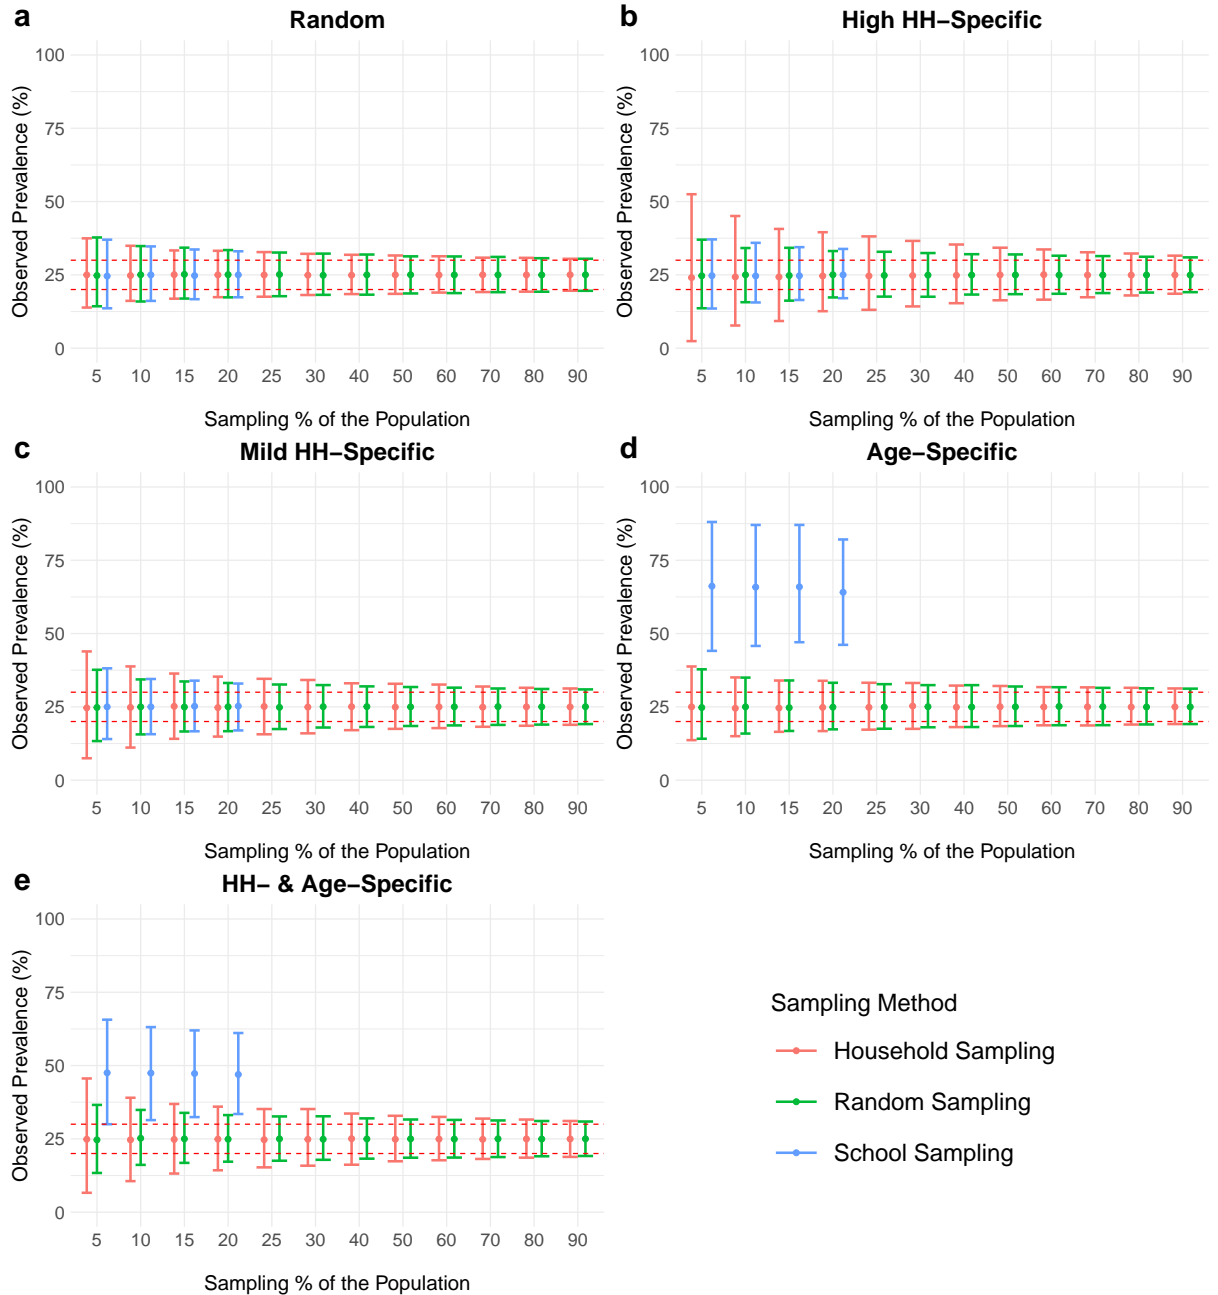

**S2 Fig. Observed scabies prevalence in samples selected using different scabies assignment methods and different input prevalence percentages.** The results (median and 2.5% to 97.5% quantiles) are plotted for four exemplar input prevalence percentages of (a) 5%, (b) 10%, (c) 20%, (d) 40% across all population sizes with a sampling percentage of 20%. Red dashed lines represent the input prevalences.

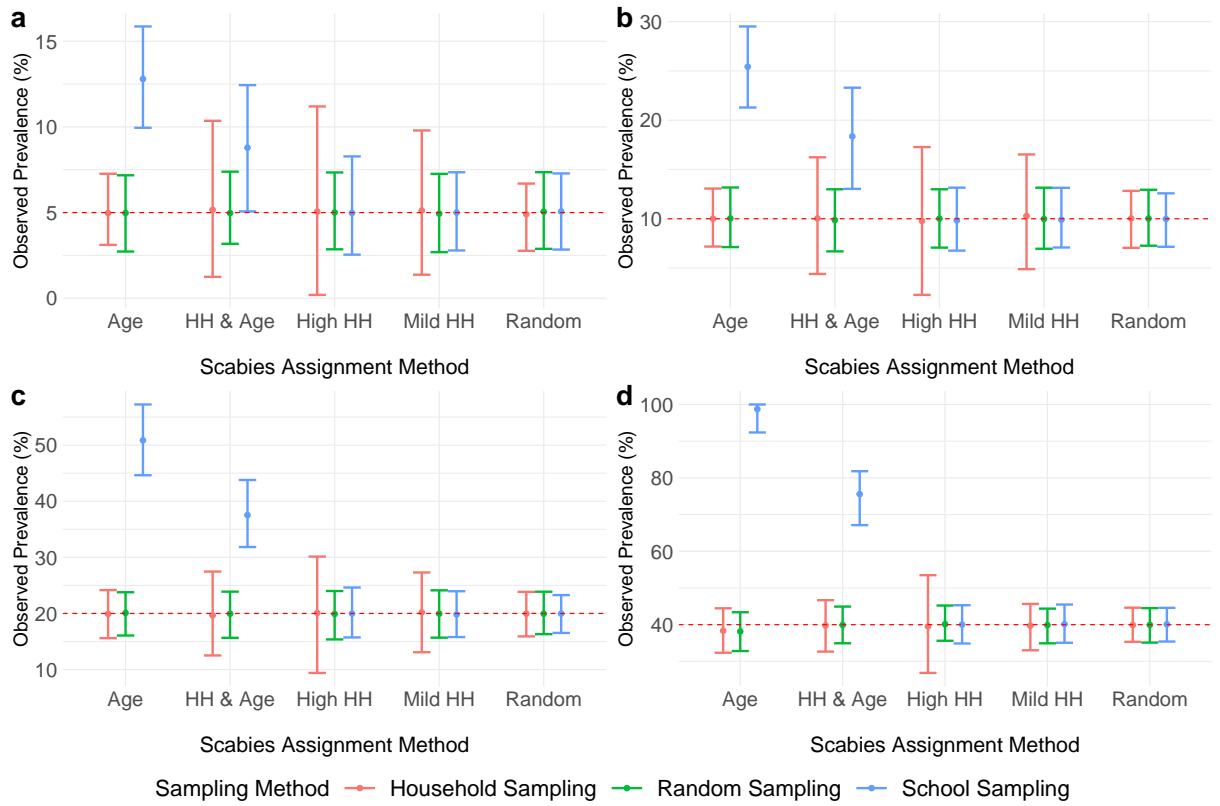

**S3 Fig.** Observed scabies prevalence in samples selected using different sampling methods and sampling percentages across populations with (a) small ([500, 1500]), (b) medium ((1500, 2500]), and (c) large sizes ((2500,4000]). The results (median and 2.5% to 97.5% quantiles) are plotted for an exemplar input prevalence percentage between 20-30% with a sampling percentage of 20%. Red dashed lines represent 20% and 30% prevalence. In the school-based sampling strategy the highest sampling percentages could not be achieved due to insufficient population size in the school aged group.

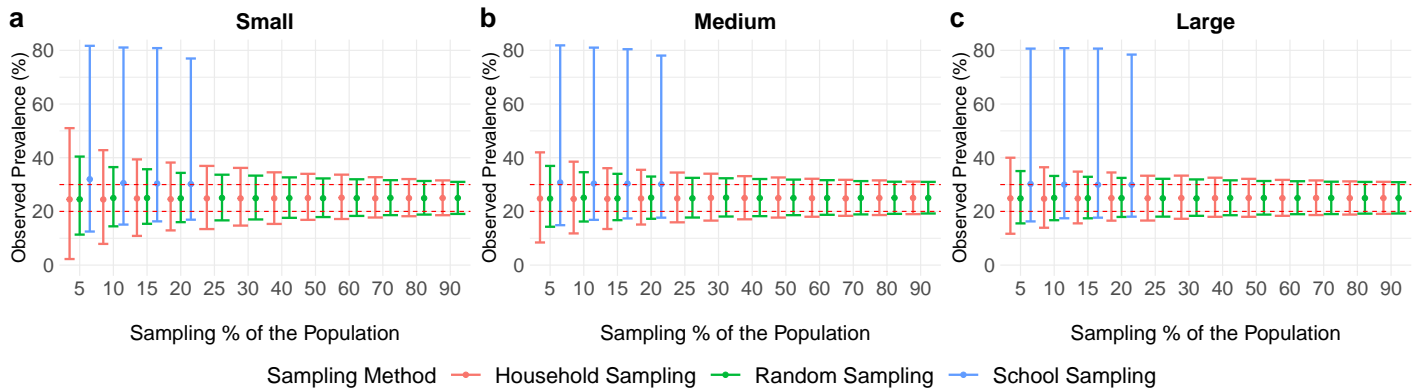

**S4 Fig. Observed scabies prevalence in samples selected using different sampling methods, sampling percentages, and input prevalence.** The results (median and 2.5% to 97.5% quantiles) are plotted for four exemplar input prevalence percentages of (a) 5%, (b) 10%, (c) 20%, (d) 40% across all population sizes with a sampling percentage of 20%. Red dashed lines represent the input prevalences. In the school-based sampling strategy the highest sampling percentages could not be achieved due to insufficient population size in the school aged group.

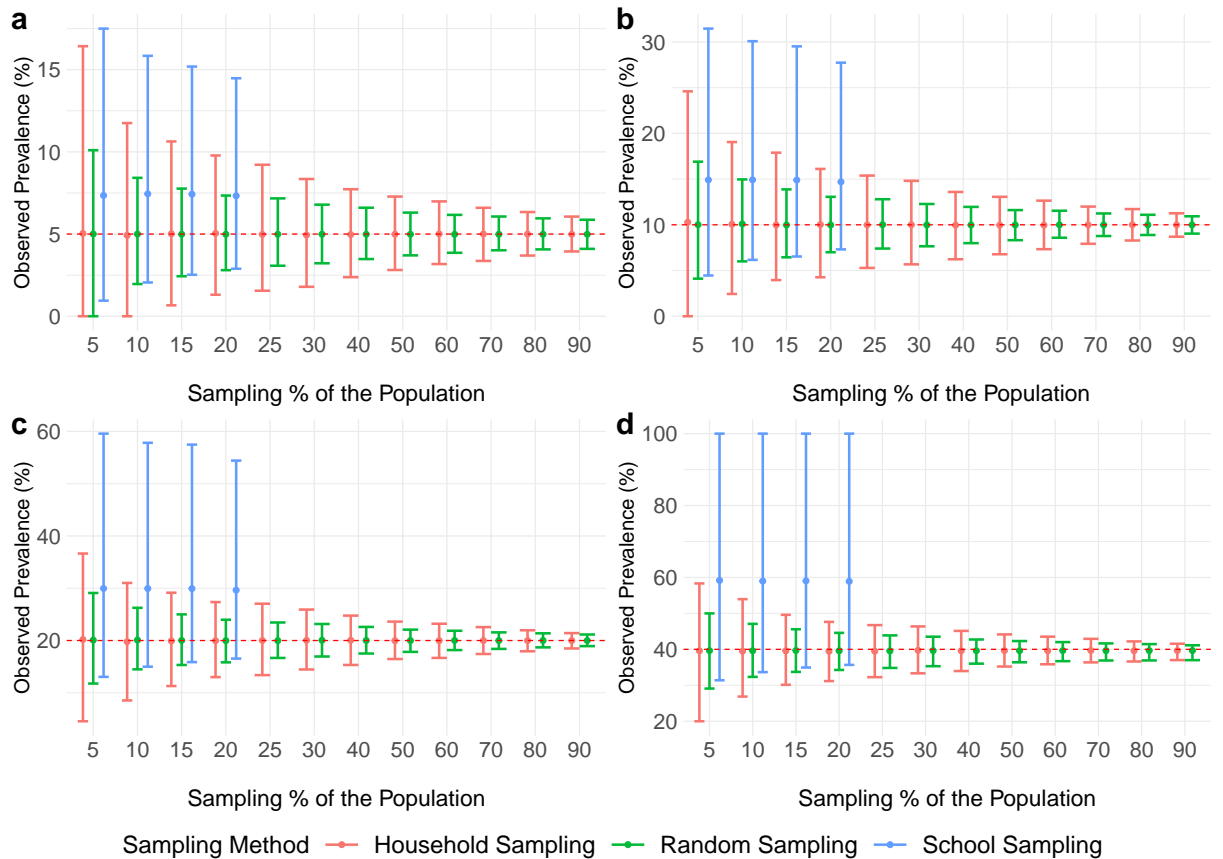

**S5 Fig.** A generic pseudo code for measuring the efficacy of sampling methods in estimating point prevalence of a given disease.

---

---

```
1 Assign population characteristics such as population size ( $N$ ), household
  distribution, and age distribution in household groups;
2 Assign disease assignment methods based on how disease prevalence differs in
  sub-populations such as age, gender, and household groups;
3 Assign a range for the prevalence percentage of disease based on a priori
  knowledge of the disease in the population;
4 Assign a set of sampling methods and sampling percentages;
5 Set the number of populations to be generated,  $M$ ;
6 for  $i \in \{1, 2, \dots, M\}$  do
7   Generate a population dataset, with size of  $N$  by assigning household and
   age groups;
8   for each disease assignment method do
9     for each specified prevalence percentage do
10      Assign scabies to selected individuals based on disease assignment
      method and specified prevalence percentage;
11      for each sampling method do
12        for each sampling percentage do
13          Sample the population using the sampling method and
          sampling percentage;
14        end
15      end
16    end
17  end
18 end
19 Compare the prevalence percentage in the overall and sampled population
```

---

---

**S1 Table. Required sample sizes estimated from simulation results for the simple random, household, and school sampling methods to achieve a given precision, where input scabies prevalence is distributed according to the random method.** Small, medium, and large population sizes represent ranges of [500, 1500], (1500, 2500], (2500, 4000]. For the scenarios with X's in school sampling, sampling all school-aged children was insufficient to have 95% confidence that prevalence within the selected precision could be obtained.

| Population Size | <i>a priori</i> prevalence (%) | Precision              |     |     |                    |     |     |                 |     |     |
|-----------------|--------------------------------|------------------------|-----|-----|--------------------|-----|-----|-----------------|-----|-----|
|                 |                                | Simple Random Sampling |     |     | Household Sampling |     |     | School Sampling |     |     |
|                 |                                | 2%                     | 5%  | 10% | 2%                 | 5%  | 10% | 2%              | 5%  | 10% |
| Small           | 5–10                           | 50%                    | 15% | 5%  | 50%                | 15% | 5%  | X               | 15% | 5%  |
| Small           | >10–20                         | 60%                    | 25% | 10% | 70%                | 25% | 10% | X               | 20% | 10% |
| Small           | >20–30                         | 80%                    | 30% | 10% | 80%                | 30% | 10% | X               | X   | 10% |
| Small           | >30–40                         | 80%                    | 30% | 15% | 80%                | 40% | 10% | X               | X   | 15% |
| Medium          | 5–10                           | 30%                    | 10% | 3%  | 25%                | 10% | 3%  | X               | 10% | 3%  |
| Medium          | >10–20                         | 50%                    | 10% | 5%  | 50%                | 15% | 5%  | X               | 15% | 3%  |
| Medium          | >20–30                         | 50%                    | 20% | 5%  | 60%                | 15% | 5%  | X               | 20% | 5%  |
| Medium          | >30–40                         | 60%                    | 20% | 5%  | 60%                | 20% | 10% | X               | 20% | 5%  |
| Large           | 5–10                           | 20%                    | 5%  | 3%  | 25%                | 3%  | 1%  | 20%             | 5%  | 3%  |
| Large           | >10–20                         | 40%                    | 10% | 3%  | 40%                | 10% | 3%  | X               | 10% | 3%  |
| Large           | >20–30                         | 40%                    | 10% | 3%  | 50%                | 10% | 3%  | X               | 15% | 3%  |
| Large           | >30–40                         | 50%                    | 15% | 3%  | 50%                | 10% | 3%  | X               | 15% | 3%  |

**S2 Table.** Required sample sizes estimated from simulation results for the simple random, household, and school sampling methods to achieve a given precision, where input scabies prevalence is distributed according to the high household-specific method. Small, medium, and large population sizes represent ranges of [500, 1500], (1500, 2500], (2500, 4000]. For the scenarios with X's in school sampling, sampling all school-aged children was insufficient to have 95% confidence that prevalence within the selected precision could be obtained.

| Population Size | <i>a priori</i> prevalence (%) | Precision              |     |     |                    |     |     |                 |     |     |
|-----------------|--------------------------------|------------------------|-----|-----|--------------------|-----|-----|-----------------|-----|-----|
|                 |                                | Simple Random Sampling |     |     | Household Sampling |     |     | School Sampling |     |     |
|                 |                                | 2%                     | 5%  | 10% | 2%                 | 5%  | 10% | 2%              | 5%  | 10% |
| Small           | 5–10                           | 50%                    | 15% | 5%  | >90%               | 50% | 20% | X               | 15% | 5%  |
| Small           | >10–20                         | 70%                    | 25% | 10% | >90%               | 70% | 40% | X               | X   | 15% |
| Small           | >20–30                         | 70%                    | 40% | 10% | >90%               | 80% | 50% | X               | X   | 10% |
| Small           | >30–40                         | 90%                    | 30% | 10% | >90%               | 80% | 50% | X               | X   | 10% |
| Medium          | 5–10                           | 40%                    | 10% | 3%  | 80%                | 25% | 15% | X               | 10% | 3%  |
| Medium          | >10–20                         | 60%                    | 15% | 3%  | 90%                | 60% | 20% | X               | 15% | 3%  |
| Medium          | >20–30                         | 70%                    | 20% | 5%  | >90%               | 60% | 25% | X               | 20% | 5%  |
| Medium          | >30–40                         | 80%                    | 20% | 10% | >90%               | 70% | 25% | X               | X   | 10% |
| Large           | 5–10                           | 30%                    | 5%  | 1%  | 70%                | 25% | 10% | X               | 5%  | 3%  |
| Large           | >10–20                         | 40%                    | 10% | 3%  | 90%                | 40% | 15% | X               | 10% | 3%  |
| Large           | >20–30                         | 50%                    | 10% | 3%  | 90%                | 50% | 15% | X               | 15% | 5%  |
| Large           | >30–40                         | 50%                    | 15% | 3%  | 90%                | 50% | 20% | X               | 15% | 3%  |



**S3 Table. Required sample sizes estimated from simulation results for the simple random, household, and school sampling methods to achieve a given precision, where input scabies prevalence is distributed according to the mild household-specific method.** Small, medium, and large population sizes represent ranges of [500, 1500], (1500, 2500], (2500, 4000]. For the scenarios with X's in school sampling, sampling all school-aged children was insufficient to have 95% confidence that prevalence within the selected precision could be obtained.

| Population Size | <i>a priori</i> prevalence (%) | Precision              |     |     |                    |     |     |                 |     |     |
|-----------------|--------------------------------|------------------------|-----|-----|--------------------|-----|-----|-----------------|-----|-----|
|                 |                                | Simple Random Sampling |     |     | Household Sampling |     |     | School Sampling |     |     |
|                 |                                | 2%                     | 5%  | 10% | 2%                 | 5%  | 10% | 2%              | 5%  | 10% |
| Small           | 5–10                           | 60%                    | 15% | 5%  | 80%                | 40% | 10% | X               | 15% | 5%  |
| Small           | >10–20                         | 70%                    | 25% | 10% | >90%               | 50% | 20% | X               | 20% | 10% |
| Small           | >20–30                         | 80%                    | 30% | 10% | >90%               | 60% | 20% | X               | 20% | 10% |
| Small           | >30–40                         | 90%                    | 40% | 15% | 90%                | 50% | 20% | X               | X   | 10% |
| Medium          | 5–10                           | 30%                    | 10% | 3%  | 70%                | 25% | 10% | X               | 10% | 3%  |
| Medium          | >10–20                         | 60%                    | 15% | 3%  | 80%                | 30% | 15% | X               | 15% | 5%  |
| Medium          | >20–30                         | 70%                    | 15% | 5%  | 80%                | 40% | 15% | X               | 15% | 5%  |
| Medium          | >30–40                         | 60%                    | 20% | 5%  | 80%                | 40% | 15% | X               | X   | 5%  |
| Large           | 5–10                           | 20%                    | 5%  | 1%  | 60%                | 20% | 5%  | X               | 5%  | 3%  |
| Large           | >10–20                         | 40%                    | 10% | 3%  | 70%                | 25% | 10% | X               | 10% | 3%  |
| Large           | >20–30                         | 60%                    | 15% | 3%  | 80%                | 25% | 10% | X               | 10% | 3%  |
| Large           | >30–40                         | 50%                    | 15% | 3%  | 70%                | 25% | 10% | X               | 15% | 3%  |

**S4 Table. Required sample sizes estimated from simulation results for the simple random, household, and school sampling methods to achieve a given precision, where input scabies prevalence is distributed according to the age-specific method.** Small, medium, and large population sizes represent ranges of [500, 1500], (1500, 2500], (2500, 4000]. For the scenarios with X's in school sampling, sampling all school-aged children was insufficient to have 95% confidence that prevalence within the selected precision could be obtained.

| Population Size | <i>a priori</i> prevalence (%) | Precision              |     |     |                    |     |     |                 |    |     |
|-----------------|--------------------------------|------------------------|-----|-----|--------------------|-----|-----|-----------------|----|-----|
|                 |                                | Simple Random Sampling |     |     | Household Sampling |     |     | School Sampling |    |     |
|                 |                                | 2%                     | 5%  | 10% | 2%                 | 5%  | 10% | 2%              | 5% | 10% |
| Small           | 5–10                           | 50%                    | 20% | 3%  | 50%                | 10% | 5%  | X               | X  | X   |
| Small           | >10–20                         | 70%                    | 20% | 10% | 80%                | 25% | 10% | X               | X  | X   |
| Small           | >20–30                         | 80%                    | 30% | 10% | 90%                | 40% | 15% | X               | X  | X   |
| Small           | >30–40                         | >90%                   | 70% | 10% | >90%               | 70% | 15% | X               | X  | X   |
| Medium          | 5–10                           | 40%                    | 5%  | 3%  | 30%                | 10% | 3%  | X               | X  | X   |
| Medium          | >10–20                         | 50%                    | 15% | 5%  | 50%                | 15% | 5%  | X               | X  | X   |
| Medium          | >20–30                         | 70%                    | 15% | 5%  | 80%                | 20% | 10% | X               | X  | X   |
| Medium          | >30–40                         | >90%                   | 25% | 5%  | >90%               | 30% | 10% | X               | X  | X   |
| Large           | 5–10                           | 20%                    | 5%  | 3%  | 20%                | 5%  | 3%  | X               | X  | X   |
| Large           | >10–20                         | 50%                    | 10% | 3%  | 40%                | 10% | 3%  | X               | X  | X   |
| Large           | >20–30                         | 50%                    | 15% | 3%  | 70%                | 15% | 3%  | X               | X  | X   |
| Large           | >30–40                         | >90%                   | 20% | 5%  | >90%               | 30% | 10% | X               | X  | X   |

**S5 Table. Required sample sizes estimated from simulation results for the simple random, household, and school sampling methods to achieve a given precision, where input scabies prevalence is distributed according to the age-and-household-specific method.** Small, medium, and large population sizes represent ranges of [500, 1500], (1500, 2500], (2500, 4000]. For the scenarios with X's in school sampling, sampling all school-aged children was insufficient to have 95% confidence that prevalence within the selected precision could be obtained.

| Population Size | <i>a priori</i> prevalence (%) | Precision              |     |     |                    |     |     |                 |    |     |
|-----------------|--------------------------------|------------------------|-----|-----|--------------------|-----|-----|-----------------|----|-----|
|                 |                                | Simple Random Sampling |     |     | Household Sampling |     |     | School Sampling |    |     |
|                 |                                | 2%                     | 5%  | 10% | 2%                 | 5%  | 10% | 2%              | 5% | 10% |
| Small           | 5-10                           | 60%                    | 15% | 5%  | 90%                | 50% | 20% | X               | X  | X   |
| Small           | >10-20                         | 70%                    | 25% | 10% | >90%               | 50% | 20% | X               | X  | X   |
| Small           | >20-30                         | 90%                    | 25% | 10% | >90%               | 60% | 25% | X               | X  | X   |
| Small           | >30-40                         | 90%                    | 30% | 15% | >90%               | 60% | 20% | X               | X  | X   |
| Medium          | 5-10                           | 30%                    | 10% | 3%  | 70%                | 25% | 10% | X               | X  | X   |
| Medium          | >10-20                         | 50%                    | 10% | 3%  | 90%                | 40% | 15% | X               | X  | X   |
| Medium          | >20-30                         | 60%                    | 15% | 5%  | 90%                | 40% | 15% | X               | X  | X   |
| Medium          | >30-40                         | 60%                    | 15% | 5%  | 80%                | 40% | 15% | X               | X  | X   |
| Large           | 5-10                           | 30%                    | 5%  | 3%  | 60%                | 15% | 5%  | X               | X  | X   |
| Large           | >10-20                         | 40%                    | 10% | 3%  | 70%                | 25% | 10% | X               | X  | X   |
| Large           | >20-30                         | 50%                    | 15% | 3%  | 80%                | 25% | 10% | X               | X  | X   |
| Large           | >30-40                         | 50%                    | 15% | 3%  | 80%                | 25% | 10% | X               | X  | X   |
